# Supplementary material for: Exploring the Anti-Inflammatory Effect of Inulin by Integrating Transcriptomic and Proteomic Analyses in a Murine Macrophage Cell Model
Source: MDPI journal article supplement (doi:10.3390/nu15040859), 2023-02-08
Supplement: s1 [file s1]

# Supplementary Materials

**Supplementary Table S1.** Amplification system for the genes of interest and for the genes used in normalization in the qPCR validation.

|    | Gene ID | GenBank accession | PrimerBank ID | PrimerBank Validation |                                             | Primer Name | Forward Primer           | Primer Name | Reverse Primer          | Amplicon size | Tm            |
|----|---------|-------------------|---------------|-----------------------|---------------------------------------------|-------------|--------------------------|-------------|-------------------------|---------------|---------------|
| 1  | Ptgs2   | NM_011198         | 31981525a1    | yes                   | PROTEOMICS AND TRANSCRIPTOMICS COMMON GENES | Ptgs2_F     | TGAGCAACTATTCCAACCAGC    | Ptgs2_R     | GCACGTAGTCTTCGATCACTATC | 74            | 60,3°C/62,9°C |
| 2  | Oasl1   | NM_145209         | 21630289a1    | yes                   |                                             | Oasl1_F     | CAGGAGCTGTACGGCTTCC      | Oasl1_R     | CCTACCTTGAGTACCTTGAGCAC | 191           | 61,6°C/64,6°C |
| 3  | Fabp4   | NM_024406         | 14149635a1    | yes                   |                                             | Fabp4_F     | AAGGTGAAGAGCATCATAACCCCT | Fabp4_R     | TCACGCCCTTCATAACACATTCC | 133           | 61,1°C/61,1°C |
| 4  | Slc37a2 | NM_020258         | 225543197c2   | no                    |                                             | Slc37a2_F   | GGAGCTGTGGACAATGCCTT     | Slc37a2_R   | CCGAGAGGTAGTAACGCAGG    | 97            | 60,5°C/62,5°C |
| 5  | Cp      | NM_007752         | 110347563c3   | no                    |                                             | Cp_F        | ATTTTCAACGGGCTGATGACA    | Cp_R        | GGAGTGGTAAATCCTGGTCACA  | 119           | 57,4°C/62,1°C |
| 6  | Lpl     | NM_008509         | 6678710a1     | yes                   |                                             | Lpl_F       | GGGAGTTTGCTCCAGAGTTT     | Lpl_R       | TGTGTCTTCAGGGGTCCTTAG   | 115           | 61,3°C/61,3°C |
| 7  | Il1a    | NM_010554         | 52669a1       | yes                   | RELEVANT DEGS                               | Il1a_F      | CGAAGACTACAGTTCTGCCATT   | Il1a_R      | GACGTTTCAGAGGTTCTCAGAG  | 126           | 60,3°C/62,1°C |
| 8  | Il1b    | NM_008361         | 6680415a1     | yes                   |                                             | Il1b_F      | GCAACTGTTCTGAACTCAACT    | Il1b_R      | ATCTTTTGGGGTCCGTCAACT   | 89            | 60,3°C/59,4°C |
| 9  | Rgs16   | NM_011267         | 190684664c3   | no                    |                                             | Rgs16_F     | CCATGCCTTCTTAAGACGGA     | Rgs16_R     | GTACTCGTCAAAGATGTGGTGAG | 127           | 61,3°C/62,9°C |
| 10 | Il6     | AK089780          | 26354667a1    | yes                   |                                             | Il6_F       | CCAAGAGGTGAGTGCTTCCC     | Il6_R       | CTGTTGTTCAGACTCTCTCCCT  | 118           | 62,5°C/62,1°C |
| 11 | Il27    | NM_145636         | 21704110a1    | yes                   |                                             | Il27_F      | CTGTTGCTGCTACCCTTGCTT    | Il27_R      | CACTCCTGGCAATCGAGATTC   | 177           | 61,3°C/61,3°C |
| 12 | Hvcn1   | NM_001042489      | 21311863a1    | yes                   |                                             | Hvcn1_F     | ATGACTTCCCATGACCCAAAGG   | Hvcn1_R     | TCGTCCCCAACCCCGTAA      | 101           | 62,1°C/59,5°C |

  

|    | Gene    | Transcript ID      | Primer Name | Forward               | Tm Forward    | Primer Name | Reverse                | Tm Reverse    | Amplicon bp | Efficiency | R2   |
|----|---------|--------------------|-------------|-----------------------|---------------|-------------|------------------------|---------------|-------------|------------|------|
| 13 | Hdgf    | ENSMUST00000005017 | Hdgf_F      | CATGAGAGCCTGTAGCCAC   | 60,3°C        | Hdgf_R      | GTGGGCTTAGAGGAGAGAG    | 58,6°C        | 159         | 100,2      | 0,98 |
| 14 | Alg2    | ENSMUST00000044148 | Alg2_F      | AACCACTGCTTCATCGAGAC  | 59,5°C (salt) | Alg2_R      | AGACACCTGGTCGCACAC     | 59,5°C (salt) | 186         | 103,4      | 0,98 |
| 15 | Mlec    | ENSMUST00000112121 | Mlec_F      | TGGGACAGTAGACGATGTACC | 60,5°C        | Mlec_R      | GCTGTGTCCGAGGCATA      | 62,4°C        | 172         | 101        | 0,99 |
| 16 | Hsp90b1 | ENSMUST00000020238 | Hsp90b1_F   | AAAGGACTTGCGACTCGCC   | 58,4°C (salt) | Hsp90b1_R   | ATCAGCTCTGACGAACCCGA   | 59,9°C        | 96          | 100        | 0,99 |
| 17 | Brms1l  | ENSMUST00000059250 | Brms1l_F    | AGGAAGGCAATGGCTACAC   | 61,2°C        | Brms1l_R    | ACAGCACTTGTTGGGACACTC  | 56,1°C (salt) | 179         | 105        | 0,98 |
| 18 | Rpl4    |                    | Rpl4_F      | GCCGCTGGTGGTTGAAGATAA | 63,4°C        | Rpl4_R      | CGTCGGTTTCTCATTTTGCCC  | 63,6°C        | 150         |            |      |
| 19 | Gapdh   |                    | Gapdh_F     | CTCCCACTCTCCACCTTCG   | 59,5°C (salt) | Gapdh_R     | GCCTCTCTTGCTCAGTGTC    | 60,5°C (salt) | 189         |            |      |
| 20 | Actb    |                    | Actb_F      | GGCTGTATTCCCTCCATCG   | 61,3°C (salt) | Actb_R      | CCAGTTGGTAACAATGCCATGT | 62,5°C (salt) | 154         |            |      |

## Supplementary Materials

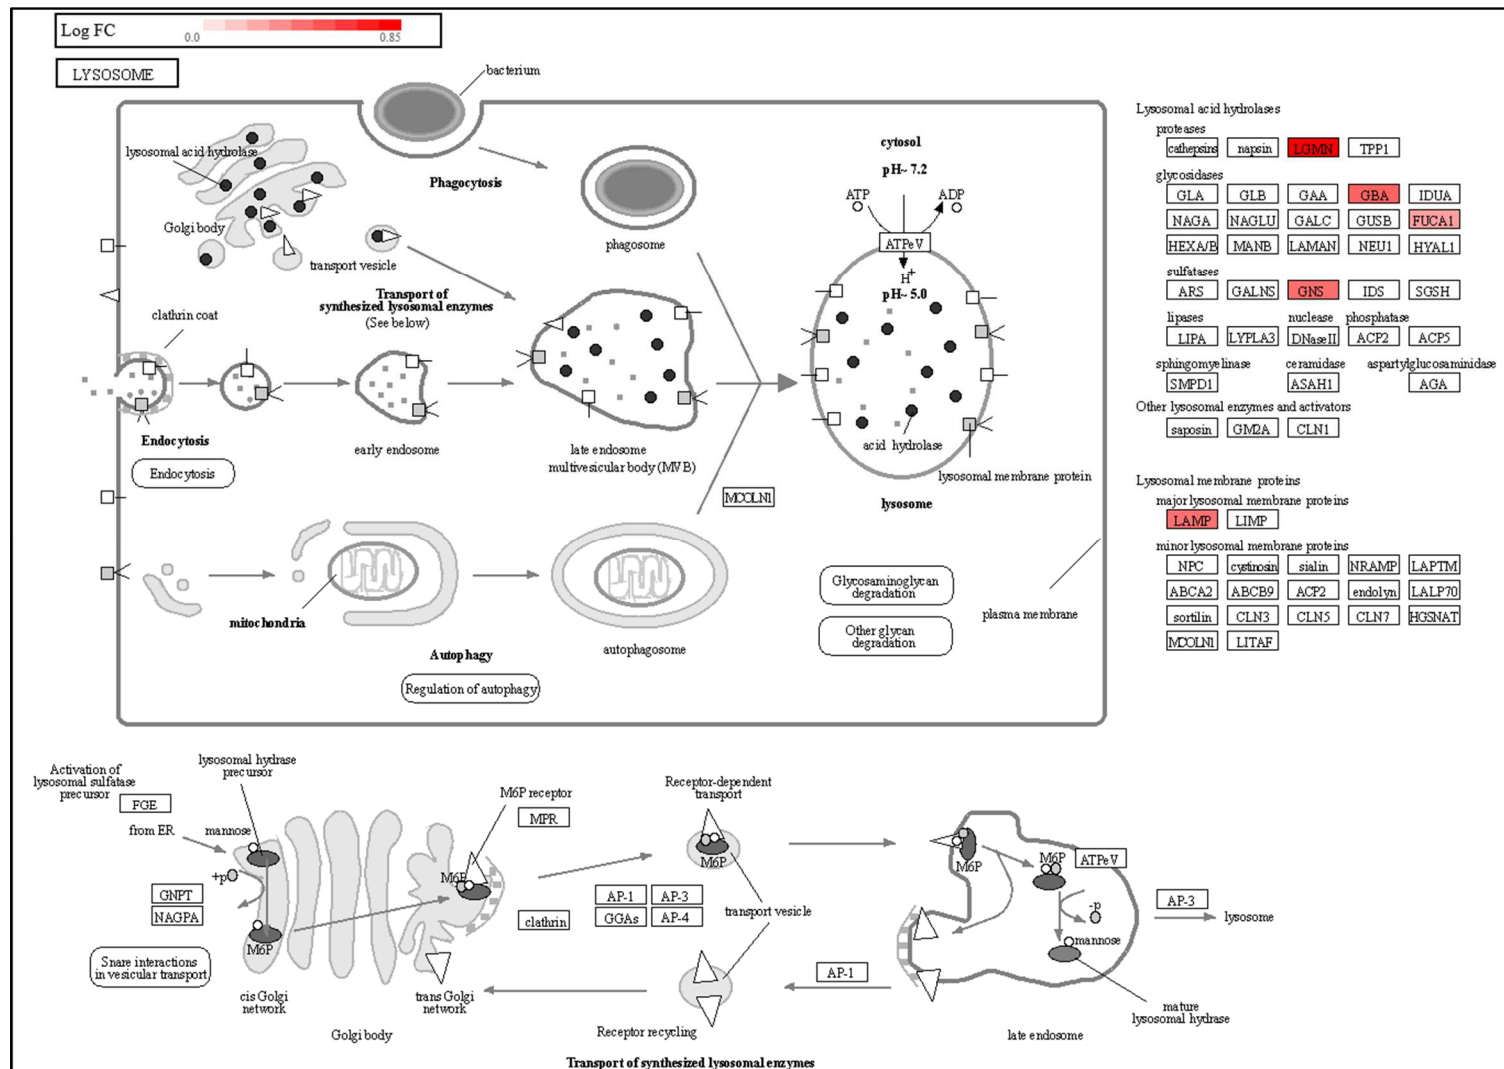

**Supplementary Figure S1.** Effect of Inulin on the Lysosome pathway (KEGG: 04142) from RAW 264.7 LPS-induced inflammation model cells. Pathway diagrams, overlayed with the measured protein fold-change showing coherent cascades. Differentially expressed genes are represented with positive values in red.

## Supplementary Materials

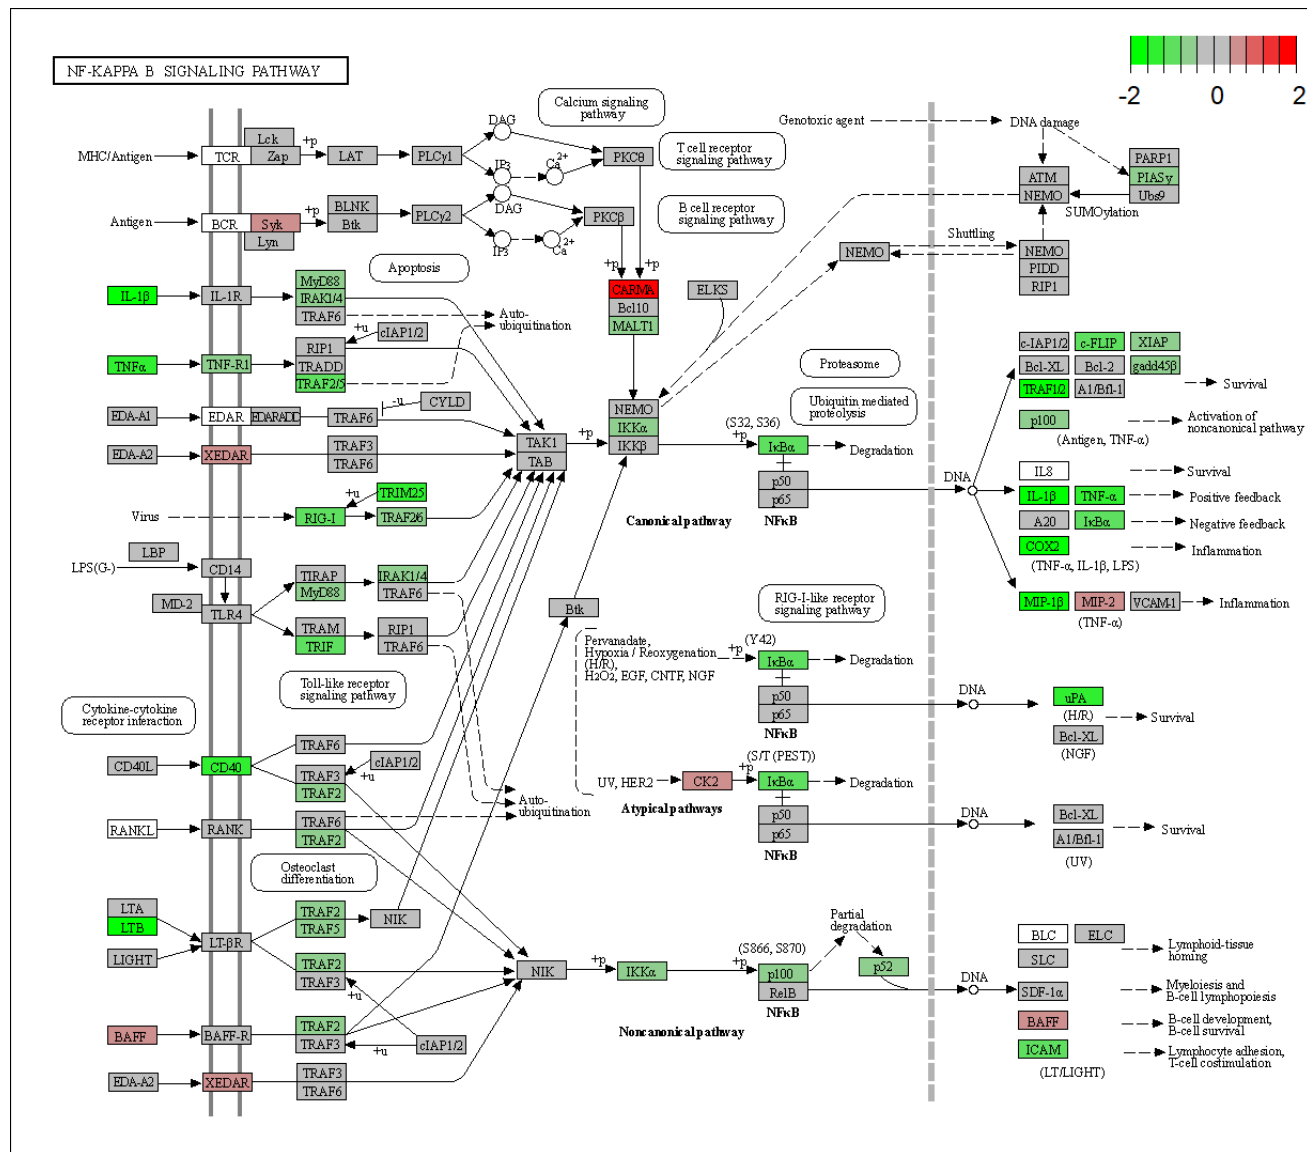

**Supplementary Figure S2.** Effect of inulin on the NF- $\kappa$ B signaling pathway showing integrated transcriptomics data. Genes over-expressed (in red) or under-expressed (green) according to the transcriptomic analysis are high-lighted.

## Supplementary Materials

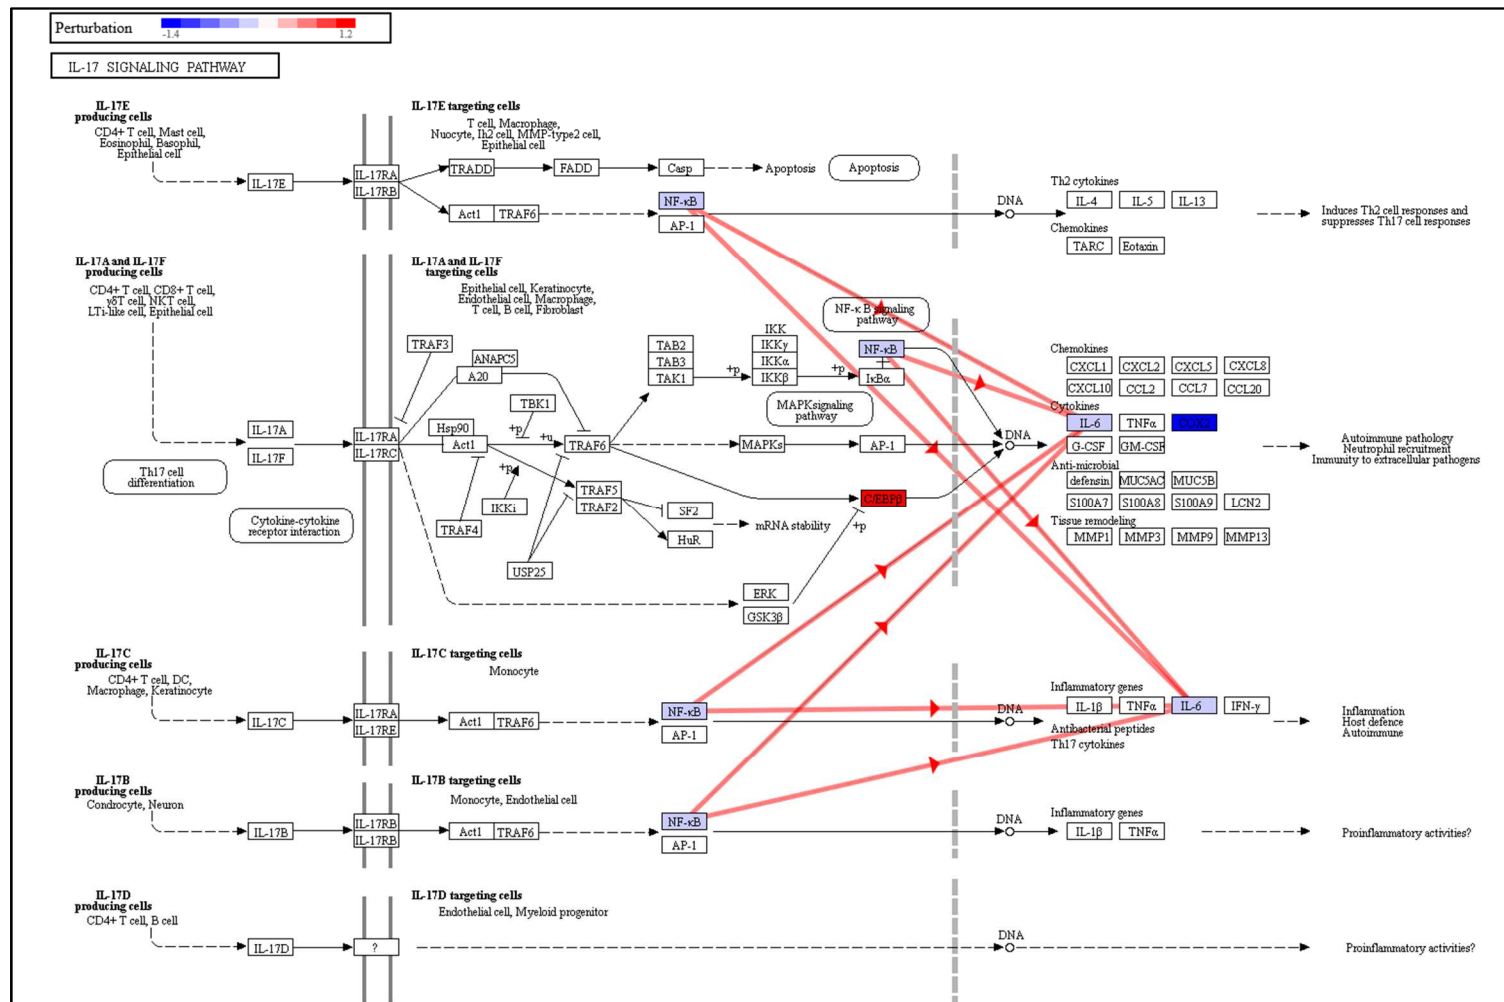

**Supplementary Figure S3.** Effect of Inulin on the IL-17 signaling pathway (KEGG: 04657) from RAW 264.7 LPS-induced inflammation model cells. Pathway diagrams, overlaid with the measured protein perturbation showing coherent cascades. Differentially expressed genes are represented with negative fold-change values in blue and positive values in red.
